# Supplementary material
Source: PubMed Central journal article supplement (PMC3893880)
Supplement: NIHMS194701-supplement-supplement_1.pdf [file NIHMS194701-supplement-supplement_1.pdf]

A.

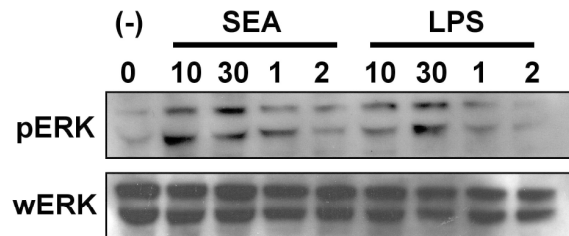

B.

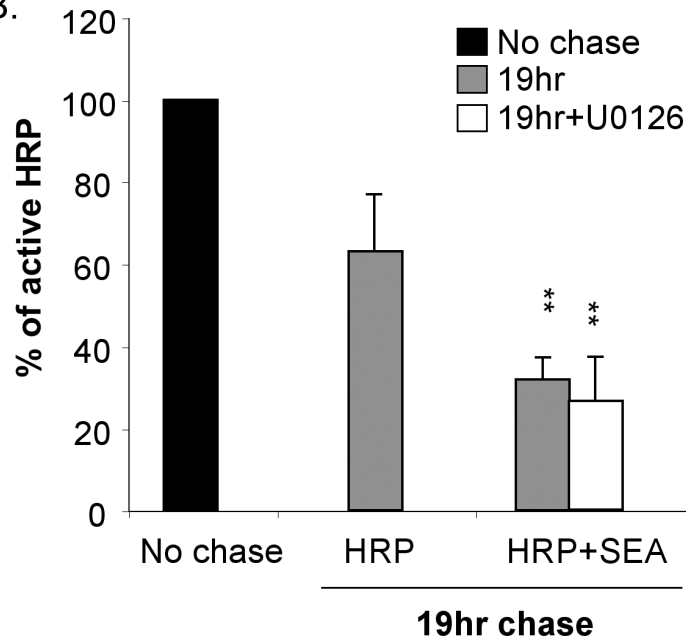

**Supplementary Figure 1.** SEA induced processing occurs in an ERK-independent manner. A. Extracts from DCs pulsed for 10min, 30min, 1hr or 2hr with SEA or LPS were electrophoretically separated, blotted, probed with Ab specific for phosphorylated ERK and to serve as a loading control, reprobed with Ab specific for unphosphorylated ERK. B. In order to determine if ERK signaling was required for SEA-mediated antigen-processing, DCs were pulsed with HRP for 1hr, washed and cultured in the presence of an ERK inhibitor, UO126 for 1hr prior to activation with SEA. After 19hrs, DCs were harvested for assessment of antigen processing capacity.
